# Supplementary material for: Composite Zn(II) Ferrocyanide/Polyethylenimine Cryogels for Point-of-Use Selective Removal of Cs-137 Radionuclides
Source: MDPI journal article supplement (doi:10.3390/molecules26154604), 2021-07-29
Supplement: s1 [file s1]

## SUPPLEMENTARY MATERIALS

# Composite Zn(II) Ferrocyanide/Polyethylenimine Cryogels for Point-of-Use Selective Removal of Cs-137 Radionuclides

Irina Malakhova <sup>1</sup>, Yuliya Parotkina <sup>1</sup>, Marina Palamarchuk <sup>1</sup>, Marina Eliseikina <sup>2</sup>, Aleksandr Mironenko

<sup>1</sup>, Alexey Golikov <sup>1</sup>, and Svetlana Bratskaya <sup>1,\*</sup>

<sup>1</sup> Institute of Chemistry, Far Eastern Branch of Russian Academy of Sciences, 159, prosp.100-letiya Vladivostoka, 690022 Vladivostok, Russia

<sup>2</sup> A.V. Zhirmunsky National Scientific Center of Marine Biology, Far Eastern Branch of Russian Academy of Sciences, 17, Palchevskogo street, 690041 Vladivostok, Russia

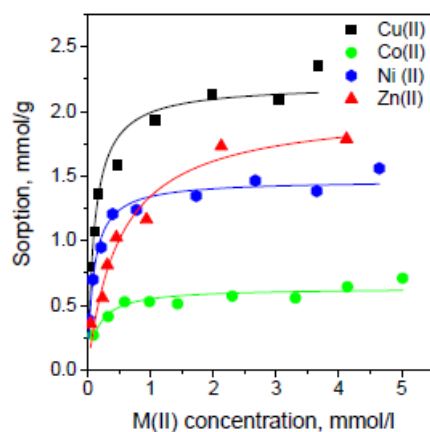

**Figure S1.** Isotherms of metal ions sorption on PEI cryogel cross-linked with DGEED at molar ratio DGEED:PEI 1:4, pH = 5, T = 25°C, Solid:Liquid ratio 1:1000, contact time 72 h.

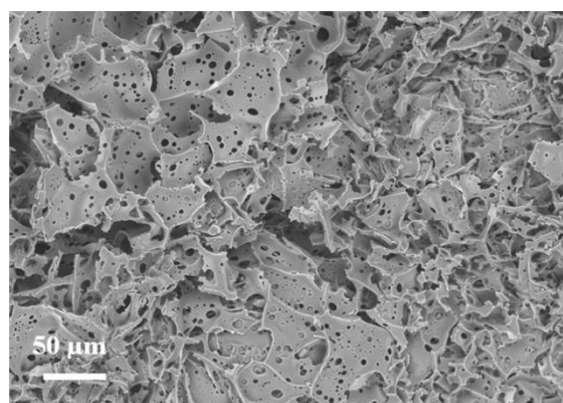

(a)

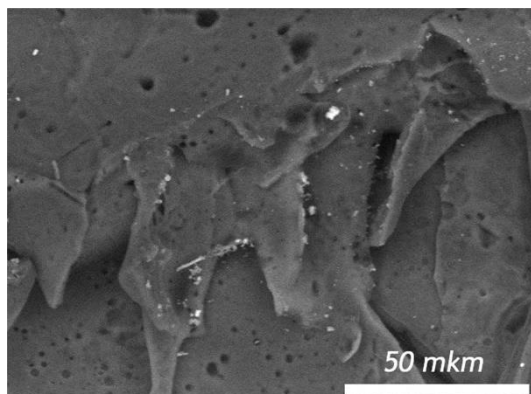

(b)

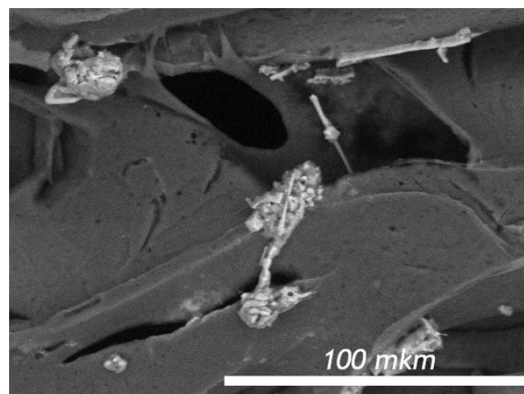

(c)

**Figure S2.** SEM image of the composite PEI/ZnFC cryogels fabricated via Method III (a) and Method II (b, c).

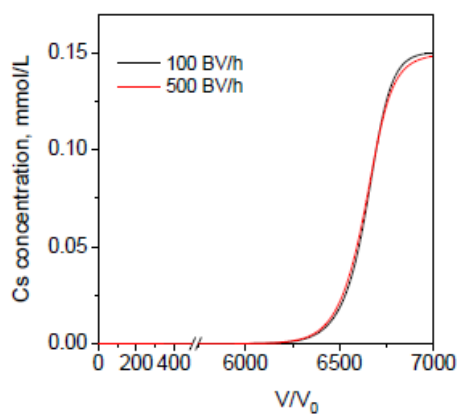

**Figure S3.** Theoretical (RCD-model) breakthrough curves of  $\text{Cs}^+$  ions sorption on PEI/ZnFC composite fabricated via Method I, 19 mgCs/L (0.14mM), monolith column diameter was 3 cm, bed length was 1.2 cm.

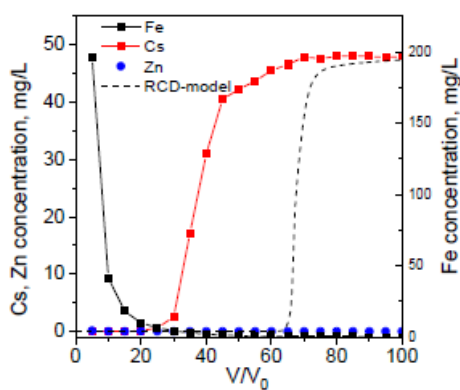

**Figure S4.** Breakthrough curves of  $\text{Cs}^+$  ions sorption on PEI/ZnFC composite fabricated via Method I and release profiles for zinc and iron, sea water, 48 mgCs/L, flow rate 100 BV/h, monolith column diameter was 0.48 cm, bed length was 6 cm: dots - experimental data, dash line - RCD-model (a). Breakthrough curve of  $\text{Cs}^+$  ions sorption on PEI/ZnFC composites (Method I) from the solution

containing 19 mgCs/L at flow rate 145 BV/h and release profiles for zinc, potassium and iron; column geometry as in Fig.5a.

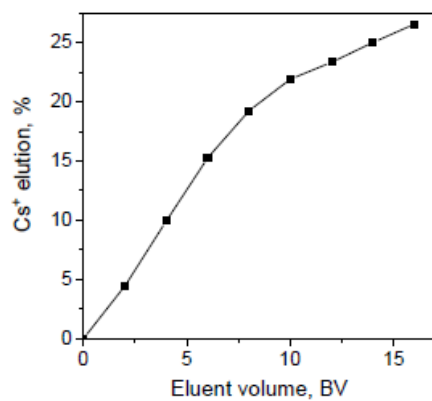

**Figure S5.** Elution of Cs<sup>+</sup> ions from PEI/ZnFC composite fabricated via Method I using 0.1M NaOH solution, flow rate 8 BV/h.
